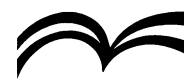

RESEARCH PAPER

# Growth, fructan yield, and quality of chicory (*Cichorium intybus* L.) as related to photosynthetic capacity, harvest time, and water regime

Andrea Monti\*, Maria Teresa Amaducci, Giuseppe Pritoni and Gianpietro Venturi

Department of Agroenvironmental Science and Technologies, University of Bologna, Viale G Fanin 44/46, I-40127, Bologna, Italy

Received 6 December 2004; Accepted 16 February 2005

## Abstract

Fructans are polymers that are widely used in several industrial applications. In the last few years they have received increasing interest because of their positive effects on health. At present, fructans are mostly supplied by chicory, which is only grown and processed in The Netherlands, France, and Belgium. It would therefore be an attractive concept to expand its cultivation to the southern European countries, although water shortage and high temperatures may hinder its growth and yield. So far, few experiments have been carried out on the effects of water, so the present research was focused on the course of growth and fructan quality in rainfed ( $W_0$ ) and well-watered ( $W_1$ ) conditions. The positive effects of water restoration mostly concerned the above-ground dry weight (ADW), whereas the root dry weight (RDW) was less influenced. No significant differences on RDW were found in 1999, whereas it was 14% higher ( $P < 0.01$ ) in  $W_1$  in 2000. The effect of water was very clear on assimilate allocation: the overall priority at the whole plant scale seemed to be root structures, then storage reserves, and finally ADW. Therefore, the fructan content was higher in  $W_0$ , and insignificant differences between  $W_0$  and  $W_1$  were found on fructan yield at the final harvests. The only significant effect of the water regime on fructans was to speed up their storage. The leaf photosynthetic capacity (A) was poorly affected by water availability, whereas it appeared consistently

modulated by leaf temperature and leaf nitrogen content. Stomatal conductance appeared to be mostly affected by the soil water content and it was mostly related to A up to about  $300 \text{ mmol m}^{-2} \text{ s}^{-1}$ . The fructan chain length (DP) was not affected by water regime. Besides, DP classes showed a normal statistical distribution; skewness and kurtosis significantly changed only when the harvest was very late. Equally, a very late harvest time significantly lowered DP.

Key words: Chicory, fructan, inulin, photosynthesis.

## Introduction

Fructans are polydisperse polysaccharides consisting of  $\beta(2,6)$  fructosyl-fructose units with one glucose unit at the reducing end (Fuchs, 1990). Within the last several years, there has been a renewed interest in fructans as they are in increasing demand in several industrial applications such as detergents and pharmaceuticals (Fuchs, 1990). In addition, fructans have been found to have positive effects on digestive health. The ingestion of moderate amounts of fructans can promote a healthy digestive system as they pass intact through the stomach and reach the intestine where they promote the intestinal microflora (De Leenheer, 1994; Roberfroid and Delzenne, 1998). Fructans may also have beneficial effects on reducing post-prandial glycaemia, insulinaemia, triglyceridaemia, and total cholesterol level (Roberfroid and Delzenne, 1998).

\* To whom correspondence should be addressed. Fax: +39 051 2096241. E-mail: [amonti@agrsci.unibo.it](mailto:amonti@agrsci.unibo.it)

Abbreviations: A, leaf net photosynthesis; ADW, above-ground dry weight; DP, degree of polymerization;  $E_t$ , evapotranspiration; FC, fructan content; FSI, free sugars index (free sugar content over total carbohydrate content); FY, fructan yield;  $g_s$ , stomatal conductance; GDD, growing degree days; K, kurtosis; LAI, leaf area index; LDMC, leaf dry matter content; NAR, net assimilation rate;  $N_{\text{leaf}}$ , leaf nitrogen content; PI, pure fructan index (total carbohydrate content expressed over the refractometer index); RDW, root dry weight; RI, refractometer index; RUE, radiation use efficiency; RWC, relative water content; SLA, specific leaf area; SK, Pearson's skewness;  $T_{\text{leaf}}$ , leaf temperature; TDR, time domain reflectometry; VIF, variance inflation factor;  $W_0$ , rain-fed plants;  $W_1$ , irrigated plants.

Despite the 36 000 fructan-containing species (Pignatelli, 1998), currently only three crops are practically processed: blue agave (for the tequila-distilling industry), Jerusalem artichoke, and chicory. The greater interest in chicory compared with Jerusalem artichoke is mainly due to its high fructan yield and quality (Meijer and Mathijssen, 1992). Chicory has been extensively grown in Europe since the beginning of the 19th century and today is by far the most commonly used, but nowadays it is only grown in The Netherlands, Belgium, and France on approximately 15 200 ha (De Bruyn *et al.*, 1992). It would therefore be an attractive possibility to expand its cultivation into southern European countries. However, Jerusalem artichoke was found to be quite tolerant to the water-stress conditions (Monti *et al.*, 2005), so chicory might be not the most cost-effective crop in southern Europe, especially when irrigation is not feasible. Moreover, Jerusalem artichokes accumulate fructans in their stems before their translocation into tubers, thus a summer harvest of stems, when soil conditions are generally more favourable, may be proposed for Jerusalem artichoke.

To the best of the authors' knowledge, many experiments have been performed on genotype screening, effects of harvest date, nitrogen supply, and plant density on root and fructan yields of chicory (Meijer and Mathijssen, 1992; Baert, 1997; Amaducci and Pritoni, 1998; Demeulemeester *et al.*, 1998; Desprez *et al.*, 1999; Monti *et al.*, 2002); it was, however, surprising to find that little is known about the effects of water stress. Moreover, the majority of the experiments on chicory was carried out in North-Central Europe where water availability and temperature do not generally represent serious constraints for growth. By contrast, the severe and durable water stress, that commonly occurs during the summer in southern European countries, could be strongly detrimental to chicory yield (Schittenhelm, 1999; Danuso, 2001). In very interesting research on fructan-containing crops, Schittenhelm (1999) found negative effects of water deficit, particularly on above-ground dry matter (leaves without crown). These results were confirmed by Skinner *et al.* (2002), although the authors never explored the effects of water deficit on fructan accumulation and degree of polymerization. The effect of high temperatures, which are known to inhibit photosynthesis and yield, was not examined (Salvucci and Crafts-Brandner, 2004; Wise *et al.*, 2004).

This research was therefore focused on the effects of water stress on fructan yield and their degree of polymerization (DP, i.e. the fructan chain length), that is a basic parameter for the industrial applications. Parallel to DP, the pure index (PI) and free sugar index (FSI) of fructan were also determined in order to assess the course of depolymerization over the growing season. The depolymerization process is modulated by two enzymes: fructan-exo-hydrolase (FEH) and fructosyl-fructosyl transferase (FFT) (Van den Ende and Van Laere, 2002) that remove terminal

fructose residues from inulin chains resulting in shorter fructan chains. The activity of the two enzymes is mostly modulated by several factors such as temperature and sucrose availability (Van den Ende and Van Laere, 2002). In particular, FEH was mostly found to be active after leaf senescence (Khuri and John, 2000) which may be linked with sucrose availability. It is well known that water stress reduces photosynthetic rate and thus, possibly, the sucrose loading to the taproot; similarly, harvest time is related to leaf senescence.

The fructan average DP of a single chicory root (commonly 10–20) is the average of short (fewer than 10 units) and long fructan chains (about 60, Roberfroid and Delzenne, 1998). Therefore, the statistical distribution of DP classes is necessary to have a reliable DP profile into a root or sample. It is shown here that the shape of the statistical distribution of the DP classes depends on the harvest time and not the water regime.

## Materials and methods

### Experimental site and treatments

The experiments were carried out in a flat soil classified as Haplic Calcisol (FAO), in Bologna, Po Valley (Lat. 44° 03', Long. 11° 02', 33 masl) in 1999 and 2000. Rainfed ( $W_0$ ) and well-watered ( $W_1$ ) plants were compared according to a randomized block design with four replications. Sowing was carried out with a pneumatic seed drill placing seeds at 0.5 cm depth, with a row spacing of 45 cm. Thinning was carried out to a final plant population of 15 plants  $m^{-2}$ . A drip irrigation system was placed on every other row. Water restorations occurred whenever evapotranspiration ( $E_t$ ) reached 30 mm.  $E_t$  was calculated daily by multiplying evaporation (class-A evaporation pan) by the specific crop coefficients (Allen *et al.*, 1998). The soil moisture contents of the  $W_0$  and  $W_1$  plots were measured weekly in three replications using the time-domain-reflectometry technique (TDR); moisture probes (CS-615, Campbell Sci., Leicestershire, UK) were placed vertically with sensors reaching 60 cm of soil depth. Biomass samples of each replication were hand-harvested over a square metre. Afterward, the most relevant morphological parameters, i.e. the leaf area, fresh and dry weights (after drying at 105 °C until constant weight) of taproots and leaves etc, were measured. An overview of the crop husbandry and sampling dates are summarized in Table 1.

Radiation use efficiency ( $RUE$ ) was determined as the slope of the regression of the accumulated dry matter and accumulated absorbed photosynthetic active radiation ( $PAR_a$ ; Monteith, 1977).  $PAR_a$  was obtained using the equation of Monsi and Saeki (1953) by the incoming  $PAR$ , leaf area index ( $LAI$ ), and extinction coefficient ( $k$ ). Leaf area was measured on all photosynthetically active leaves using the LI-3100C area meter (Li-Cor Inc.). Incoming  $PAR$  was determined by measuring the total solar radiation by placing a bi-metallic pyranograph (Robitzsch SO 2800, SIAP, Italy) near the crop, assuming that 50% of the solar radiation is  $PAR$  (Monteith and Unsworth, 1990). Since  $k$  of chicory was not found in the literature, that of lettuce (0.66) which is of a similar plant density and  $LAI$  was used (Tei *et al.*, 1996). Since chicory has a random azimuthal distribution of leaves the variation of  $k$  over time was ignored.

### Leaf traits and gas-exchange measurements

Eight leaf gas-exchange measurements were performed from May to August of the second year using a portable infrared gas analyser

**Table 1.** Crop husbandry of 1999 and 2000

|                                      | 1999                                                                                                          | 2000                                                                                    |
|--------------------------------------|---------------------------------------------------------------------------------------------------------------|-----------------------------------------------------------------------------------------|
| Cultivar                             | Bergues                                                                                                       | Bergues                                                                                 |
| Plot size (m <sup>2</sup> )          | 36                                                                                                            | 36                                                                                      |
| Previous crop                        | Wheat                                                                                                         | Wheat                                                                                   |
| Soil tillage                         | Plough (0.3 m)                                                                                                | Plough (0.3 m)                                                                          |
| Seedbed preparation                  | Harrowing                                                                                                     | Harrowing                                                                               |
| Date of sowing                       | 18 March                                                                                                      | 16 March                                                                                |
| 1000 seed weight (g)                 | 11                                                                                                            | 11                                                                                      |
| Seed density (no. m <sup>-2</sup> )  | 40                                                                                                            | 40                                                                                      |
| Date of emergence                    | 1 April                                                                                                       | 5 April                                                                                 |
| Weed control (hoeing)                | 14 April                                                                                                      | 22 April                                                                                |
| Fungicide (kg ha <sup>-1</sup> )     |                                                                                                               |                                                                                         |
| Forge                                | 6+19 April                                                                                                    |                                                                                         |
| TMTD <sup>a</sup>                    |                                                                                                               | Seed application                                                                        |
| Thinning out                         | 7 May                                                                                                         | 6 May                                                                                   |
| Plant density (no. m <sup>-2</sup> ) | 15                                                                                                            | 15                                                                                      |
| Irrigation (mm)                      | 317                                                                                                           | 134                                                                                     |
| Fertilization (kg ha <sup>-1</sup> ) |                                                                                                               |                                                                                         |
| P                                    | 43 (18 March)                                                                                                 | 43 (16 March)                                                                           |
| N                                    | 100 (11 May)                                                                                                  | 100 (2 May)                                                                             |
| Sampling dates                       | 4, 11, 18, 25 May;<br>1, 8, 23 June;<br>13 July; 3, 31 August;<br>28 September;<br>12 October; 30<br>November | 16, 30 May; 20 June;<br>18 July; 8 August;<br>5 September;<br>10 October; 7<br>November |

<sup>a</sup> Tetramethylthiuram disulphide.

(IRGA, CIRAS-1, PP Systems, Hertfordshire, UK). Leaf photosynthetic capacity (*A*), stomatal conductance (*g<sub>s</sub>*) and intercellular CO<sub>2</sub> (*C<sub>i</sub>*) were calculated as given by von Caemmerer and Farquhar (1981). The leaf gas exchange data referred to the most recently fully expanded leaves up to 11.30 h in order to escape the midday depression on *A*. During the measurements, the average *PAR* was 1600±48 μmol (quanta) m<sup>-2</sup> s<sup>-1</sup>; the CO<sub>2</sub> concentration in the air entering the chamber was 350±11 μmol mol<sup>-1</sup> (of air); the entering air flux was 250±4 cm<sup>3</sup> min<sup>-1</sup>. Some functional leaf traits were also measured on the same leaves chosen for gas-exchange measurements in order to investigate their influence upon *A*: nitrogen content (*N<sub>leaf</sub>*, Kjeldahl, 1883); the relative water content (*RWC*), i.e. the ratio of water contents in fresh to turgid leaves; the specific leaf area (*SLA*), i.e. the ratio of leaf area to leaf dry mass; the leaf dry matter content (*LDMC*).

#### Fructan analysis

Root fructan content was measured at each harvest time in 2000, but in 1999 it was only measured in the two final harvests. Root samples (about 500 g) were frozen (-18 °C) and milled in dry ice. Fructans were extracted in hot water (80 °C) for 60 min. Fructan content (*FC*) was determined as given by Baert (1997):  $FC = (F+G) - (f+g+s)$ ; where *F* and *G*, are the total fructose and glucose after acid hydrolysis (HCl) and *f*, *g*, and *s* are the reducing free sugars fructose, glucose, and sucrose before the acid hydrolysis. The amount of reducing sugars was determined by HPLC (high-performance-liquid-chromatography). The column was Rezex 8% Ca (30×0.78 cm); column temperature was 75 °C. Water with a flow rate of 0.6 ml min<sup>-1</sup> was used as the mobile phase. An analytical differential refractive index (*RI*) detector was used. The average fructan chain-length (*DP*), the pure fructan index (*PI*) and the free sugars index (*FSI*) were calculated as follow (Baert, 1997):  $DP = F/G$ ;  $PI = [(F+G)/RI] \times 100$ ;  $FSI = [(f+g+s)/(F+G)] \times 100$ , where *RI* (Brix %) is the refractive index of solids measured on a tproof sap (Palm Abbe 200, Misco, Cleveland, OH). To determine the DP classes, the samples were extracted in a hot (80 °C) water-ethanol mix (33% v/v); afterwards a 40 mg subsample of the extract was diluted in 1 ml of distilled water and than analysed

using a size-exclusion-chromatography. The DP classes were based on exclusion 30 s time-intervals.

#### Statistical analysis

All the measured and derived data were subjected to the analysis of variance (ANOVA) carried out with the Systat package (Systat Software Inc.). Bartlett's and Kolmogorov-Smirnov's tests were used, respectively, to verify the homogeneity of variance and the normal distribution of data. The relevance of leaf traits upon photosynthesis was tested by a sensitivity analysis using the adjusted multiple regression coefficient as the discriminating parameter. The variance inflation factor (*VIF*) was used to measure the multicollinearity, that is the 'inflation' of a regression parameter for an independent variable due to the redundant information in other independent variables. Briefly, the higher the *VIF*, the more redundant are the variables in the regression model.

The statistical distribution of fructan DP was assessed using the Kolmogorov-Smirnov's test. Pearson's skewness (*SK*), i.e. the ratio of the difference between mean and mode to standard deviation, was considered as an indicator of the asymmetric distribution: if the ratio of *SK* to its standard error was greater than 2 the distribution was considered asymmetric. A positive *SK* indicates a left long tail. Kurtosis (*K*) was taken as a measure of the flat distribution: negative *K* indicates a flatter shape. Again, *K* was considered significant when the ratio of *K* to its standard error was higher than 2.

## Results

#### Weather data

The seasonal rainfall distribution varied between the two years. It was higher from April to May in 1999 (+93 l m<sup>-2</sup>) and from June to August in 2000 (+88 l m<sup>-2</sup>). Air temperatures was generally higher (on average by 2 °C) in 2000, especially in the early part of the cycle. Water deficit, i.e. the difference between *Et* and rainfall, during the treatment time (1068–2858 GDD and 882–2384 GDD, in 1999 and 2000, respectively) were similar in the two years: 374 l m<sup>-2</sup> (1999) and 358 l m<sup>-2</sup> (2000). Water table depth was also similar in the two years and was not affected by irrigation (from 1.4 to 2.3 m depth from the start to the end of treatment). Conversely, during the treatment the average soil water content of *W<sub>0</sub>* was significantly lower than that of *W<sub>1</sub>* (-4.7% and -4.0% (v/v), respectively, in 1999 and 2000).

#### Dry matter accumulation and photosynthesis

The consistently higher biomass yield of 1999 (Fig. 1) was probably explained by the early rainfall which speeded up the growth of the young roots and leaves with a consequently higher intercepted solar radiation and water supply; water table being more superficial in the early growing cycle of 1999. The effects of water regime was clearly more visible on above-ground dry weight (*ADW*) and leaf area index (*LAI*) than on root dry weight (*RDW*). *ADW* was, on average, 50% higher in *W<sub>1</sub>*, whereas *RDW* was only 5% higher (Fig. 1). The early leaf area development allowed *W<sub>1</sub>* to absorb only 5% more incident photosynthetic active radiation (*PAR*) than *W<sub>0</sub>* (75% versus 80%). However, the

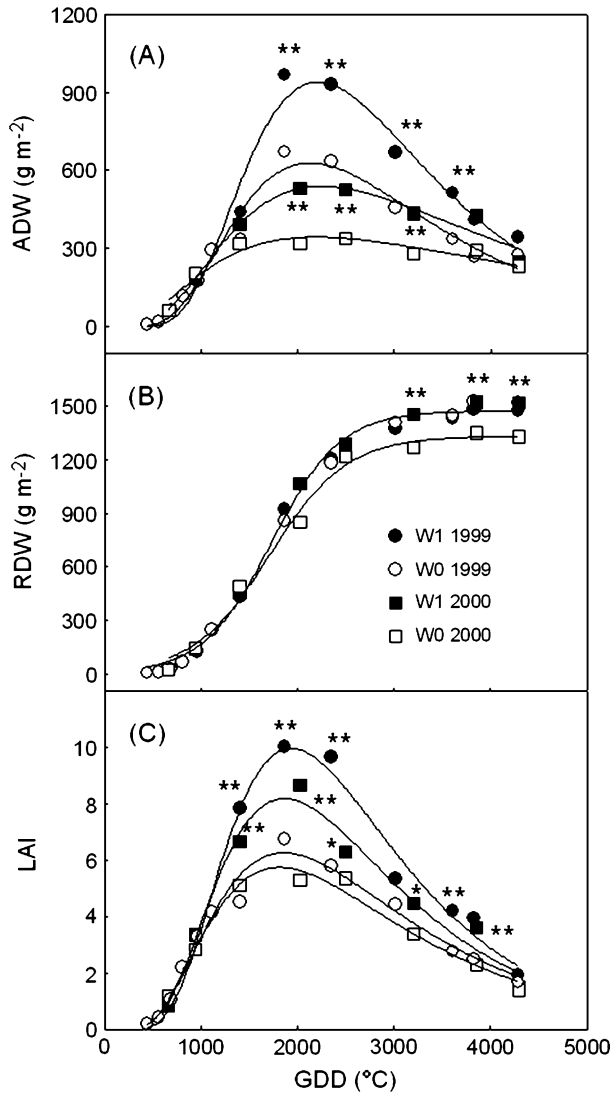

**Fig. 1.** Above-ground dry weight (*ADW*), root dry weight (*RDW*), and leaf area index (*LAI*) in 1999 and 2000. *W*<sub>1</sub> and *W*<sub>0</sub> represent well-watered and rainfed plants. *GDD* are the growing degree days (base temperature 0 °C). Log-normal equations with three parameters were used to fit *ADW* and *LAI* data; a sigmoid equation with three parameters was used to fit *RDW* data. Since the *RDW* data of *W*<sub>1</sub> and *W*<sub>0</sub> of 1999 and *W*<sub>1</sub> of 2000 were not statistically different, only one fitting on grouped data was done. All regressions were statistically significant with *R*<sup>2</sup> ranging from 0.96 to 0.99. Regression parameters were always statistically significant for *P* ≤ 0.05; \* and \*\* mean significant differences between treatments for *P* ≤ 0.05 and 0.01, respectively.

radiation use efficiency (*RUE*), which ranged from 2.6 g MJ<sup>-1</sup> to 1.9 g MJ<sup>-1</sup>, was always clearly higher in *W*<sub>1</sub> (Fig. 2).

The leaf net photosynthesis (*A*) was poorly influenced by the water regime. Leaf photosynthesis appeared significantly correlated to nearly all the leaf traits (Table 2), thus a sensitivity analysis was performed to find the traits that had the most influence upon *A*. *T*<sub>leaf</sub> appeared the most relevant factor, explaining 70% of the total *A* variation. *N*<sub>leaf</sub> added 8% to the predicting capacity, whereas all the other variables considered had little influence upon *A*

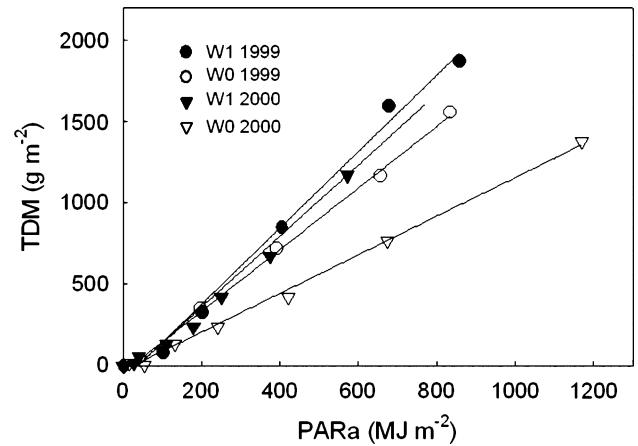

**Fig. 2.** Relationships between cumulative dry matter and absorbed *PAR* by the crop canopies in the years 1999 and 2000. The slopes of these linear regressions represent the radiation use efficiency (*RUE*, g MJ<sup>-1</sup>) of *W*<sub>0</sub> and *W*<sub>1</sub>. Fitted equations are:  $y=2.34x-92.5$ ,  $r^2=0.98$ ;  $y=2.18x-77.9$ ,  $r^2=0.99$ ;  $y=2.04x-59.2$ ,  $r^2=0.97$ ;  $y=1.89x-44.2$ ,  $r^2=0.98$ .

**Table 2.** Correlation matrix among leaf traits (upper part of the table) and sensitivity analysis (lower part)

\* and \*\* mean statistical significance for *P* < 0.05 and 0.01. Adjusted *R*<sup>2</sup> measures the ability of variables to predict the leaf photosynthesis. Thus from up to down, a forward stepwise for the best subset is shown. That is the number of + symbols in the same row mean the number of variables included in the multiple regression model, and the increasing of adj. *R*<sup>2</sup> represents the variable contribution in predicting *A*. Variance Inflation Factor (*VIF*) is the estimate of multicollinearity: variables with values larger than four are considered too redundant.

|                          | <i>g</i> <sub>s</sub> | <i>T</i> <sub>leaf</sub> | <i>SLA</i> | <i>LDMC</i> | <i>N</i> <sub>leaf</sub> | <i>RWC</i> | Adj. <i>R</i> <sup>2</sup> |
|--------------------------|-----------------------|--------------------------|------------|-------------|--------------------------|------------|----------------------------|
| <i>A</i>                 | 0.38*                 | -0.84**                  | 0.66**     | -0.67**     | 0.70**                   | -0.61**    |                            |
| <i>g</i> <sub>s</sub>    |                       | -0.37*                   | 0.03       | 0.02        | 0.11                     | 0.19       |                            |
| <i>T</i> <sub>leaf</sub> |                       |                          | -0.65**    | 0.74**      | -0.26                    | 0.59**     |                            |
| <i>SLA</i>               |                       |                          |            | -0.85**     | 0.60**                   | -0.76**    |                            |
| <i>LDMC</i>              |                       |                          |            |             | -0.66**                  | 0.79**     |                            |
| <i>N</i> <sub>leaf</sub> |                       |                          |            |             |                          | -0.67**    |                            |
| <i>RWC</i>               |                       |                          |            |             |                          |            |                            |
| Sensitivity analysis     |                       | +                        |            |             |                          |            | 0.70                       |
|                          |                       | +                        |            |             |                          |            | 0.78                       |
|                          | +                     | +                        |            |             |                          |            | 0.80                       |
|                          | +                     | +                        |            |             |                          |            | 0.82                       |
|                          | +                     | +                        |            |             |                          |            | 0.83                       |
|                          | +                     | +                        | +          |             |                          |            | 0.84                       |
|                          | +                     | +                        | +          |             |                          |            | 0.84                       |
| <i>VIF</i>               | 1.9                   | 1.6                      | 29.2       | 6.8         | 1.4                      | 4.4        |                            |

(Table 2). *T*<sub>leaf</sub> showed a close linear relation with *A* within the explored temperatures (from 28 to 38 °C) (Fig. 3). Conversely, it was unexpected to find *g*<sub>s</sub> weakly correlated to *A*. However, the Pearson's correlation coefficient measures the linear predictability, while a clear non-linear association between *A* and *g*<sub>s</sub> was observed. Specifically, a strong correlation was found between *A* and *g*<sub>s</sub> up to 300 mmol m<sup>-2</sup> s<sup>-1</sup>, whereas the correlation was much weaker above this threshold (Fig. 3). Finally, *g*<sub>s</sub> appeared not to be significantly related to the other leaf traits, whereas it was

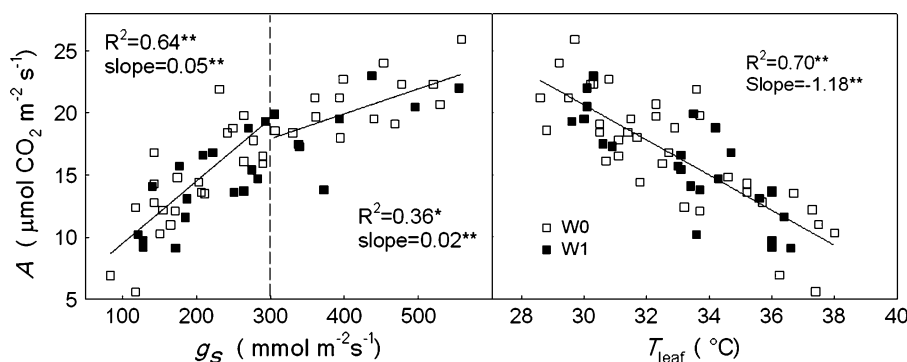

**Fig. 3.** Relationships between leaf net photosynthesis ( $A$ ) and stomatal conductance ( $g_s$ , left) and leaf temperature ( $T_{\text{leaf}}$ , right). Two separate regressions  $A$  versus  $g_s$  were fitted below and over  $300 \text{ mmol m}^{-2} \text{ s}^{-1}$ .  $W_0$  and  $W_1$  represent rainfed and well-watered plants, respectively.  $R^2$  is the regression coefficient; \* and \*\* mean significance level for  $P \leq 0.05$  and  $0.01$ .

affected by soil drying ( $r=0.69^{**}$ ). Thus, soil drying somewhat modulated  $A$  as well ( $r=0.47^*$ ).

#### Fructan accumulation

The significant differences in fructan contents ( $FC$ ) and fructan yields ( $FY$ ) between  $W_0$  and  $W_1$  were limited to the three first irrigations,  $W_1$  showing a faster fructan accumulation than  $W_0$  (Fig. 4). At about 2000 thermal units,  $FC$  was 42% higher in  $W_1$ , while  $FY$  was still higher (78%) due to the higher  $RDW$  of  $W_1$ . However, a few days later (2500 GDD)  $W_0$  and  $W_1$  showed similar  $FY$  values, and at the last harvest no significant differences were found between treatments or years.

Water regime did not significantly modify the maximum DP that was 13.7 in  $W_0$  and 14.2 in  $W_1$ . Since DP was strictly correlated with  $FC$  ( $r=0.92^{**}$ ), the maximum DP occurred 60 d earlier in  $W_1$ .

Since DP merely represents the average value of fructan chain length, the statistical distribution of DP classes around the mean was also investigated. DP strongly varied from 2 to more than 100, showing a natural trend platykurtic distribution of the DP classes (negative kurtosis). Generally, the statistical distribution of DP classes did not deviate from the Gaussian curve (Fig. 5). Water regime did not affect the Pearson's skewness ( $SK$ ) and  $K$ . Conversely, harvest time appeared to have a strong influence upon the fructan chain length and the statistical distribution of DP (Fig. 5). Specifically, during the final harvest of 1999, the average DP decreased from 12 to less than 4, while the DP distribution showed a significant low  $K$  ( $-1.94$ ), i.e. a long right tail. This only included 36% of the total DP values in the two central classes, compared with 47–49% at the other harvest times in the same or in the following year.

The reducing free sugars were measured at each sampling date and represented as pure (PI) and free sugar indices (FSI). FSI and PI indices appeared neither correlated to each other nor changing over time and treatments. FSI ranged from 4% to 7%; PI from 85% to 89%. Similar values were

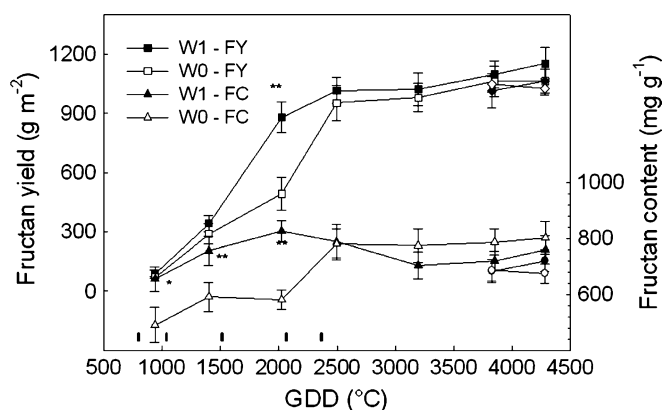

**Fig. 4.** Course of fructan yield ( $FY$ ) and fructan content ( $FC$ ). Circle and diamonds (filled symbols =  $W_1$ ; unfilled symbols =  $W_0$ ) represent  $FY$  and  $FC$  measured in the two last harvests of 1999. Vertical bars are the standard error of means; \* and \*\* indicate the statistically significant difference between means for  $P \leq 0.05$  and  $0.01$ , respectively. Vertical marks correspond to each irrigation day.

found also by Baert (1997). Sucrose, glucose, and fructose hardly changed over the growing season, being less than 2%. Free sugars were also significantly related to the refractometer index ( $RI$ ) ( $r=0.83^{**}$ ,  $0.91^{**}$ , and  $0.63^*$ , respectively, for sucrose, glucose, and fructose), that increased over time from 8.5 (900 GDD) to 13.6 °Brix (4300 GDD). Unfortunately,  $RI$  appeared to be ineffective in predicting DP or  $FC$ .

#### Discussion

According to Hsiao (1973), the effects of the higher water availability were mostly on the above-ground biomass. Conversely, root growth was hardly affected by water regimes.  $W_0$  allocated higher proportional amounts of assimilates to the taproot than  $W_1$  which, in turn, showed 50% higher source. By contrast, fructan accumulation was much faster in  $W_1$  than  $W_0$ . Therefore, even if the mechanism of assimilate distribution among the different biomass

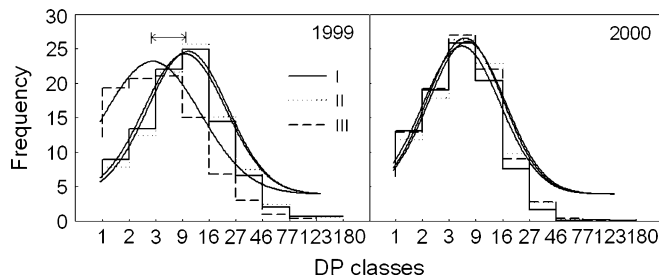

**Fig. 5.** Statistical distribution of the nine DP categories (classes) obtained with an exclusion time-interval of 30 s. Each histogram represents a class of DP during the three last harvests of 1999 and 2000. Gaussian curves fitted on real data were highly representative, except for the last harvest of 1999 which also determined a DP reduction. I, II, and III represent the three harvest times of 1999 and 2000: 1 September, 12 October, and 1 December 1999; 6 September, 10 October, and 6 November 2000.

parts is still not well known, the order of priority at the whole plant level of chicory seems to be root structural parts, then reserves (fructan), and finally the above-ground biomass. Therefore, it may be supposed that the larger source of  $W_1$  triggered off a fast fructan loading, afterward the assimilates were used to form new leaves when the sink became limiting. The approach of this research was at too large a scale to allow a more detailed mechanistic explanation of the source–sink relationships.

Radiation use efficiency was higher in  $W_1$ . However, despite the higher biomass yield of  $W_1$  the intercepted  $PAR$  of  $W_1$  was only 5% higher than  $W_0$  (+32 and +57  $\text{MJ m}^{-2}$  in 1999 and 2000, respectively). Therefore, as given by  $RUE$ ,  $W_1$  was expected to accumulate 83  $\text{g m}^{-2}$  (1999) and 148  $\text{g m}^{-2}$  (2000) more dry biomass than  $W_0$ , i.e. 20% and 50% less than that measured on total accumulated biomass. A higher photosynthetic capacity of  $W_1$  was therefore suspected, but this was only weakly demonstrated by the leaf gas exchange measurements.

The effect of water regime was more evident on marketable products (fructans) than on total dry matter. In fact, when  $RUE$  was weighted on fructans instead of the total dry matter, it appears very similar in  $W_0$  and  $W_1$  (1.0 and 1.1  $\text{g (fructan) MJ}^{-1}$ ). Similarly, the net assimilation rate ( $NAR$ ) weighted on  $FY$  (i.e. by multiplying  $NAR$  per  $FC$ ) appeared frequently higher in  $W_0$  (Fig. 6). Therefore, all things being equal, the crop effectiveness on fructan accumulation was not reduced by the water deficit.

Among the leaf traits,  $T_{\text{leaf}}$  showed the highest influence upon  $A$ . For every additional degree of the explored  $T_{\text{leaf}}$  the photosynthetic capacity was expected to be reduced by 1.4  $\mu\text{mol m}^{-2} \text{s}^{-1}$ , thus 56% less photosynthetic capacity was observed from 28–38 °C. The negative effects of high  $T_{\text{leaf}}$  were found both in the early and late parts of the growing cycle, therefore the suspected combined effects of  $T_{\text{leaf}}$  and age were not confirmed. Conversely, a lower  $N_{\text{leaf}}$  was generally found in old leaves that showed a low photosynthetic capacity as well. Thus a linear regression model could be considered between  $A$  (dependent variable) and

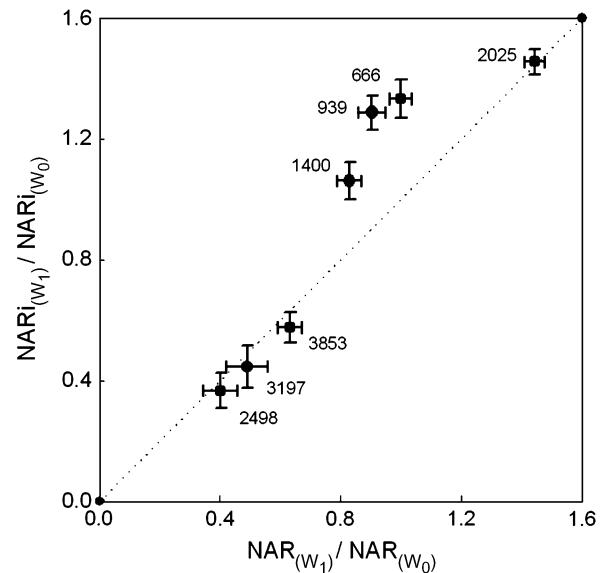

**Fig. 6.** Effect of water restoration weighted on total dry matter or fructans.  $NAR_i$  and  $NAR$  are the net assimilation rate weighted on fructans and dry matter, respectively.  $W_1$  and  $W_0$  represent well-watered and rainfed plants. The distance of points from the dashed line (1:1 ratio) is a measure of the different effect of water restoration on total dry matter and fructan accumulation. Thus there is a strong effect of water regime on fructans in the early period (666, 939, and 1400). Numbers beside each point indicate the corresponding growing degree days (GDD). Vertical and horizontal bars are the mean standard errors of  $NAR_i$  and  $NAR$  ratios.

$T_{\text{leaf}}$  (driving variable), whereas  $N_{\text{leaf}}$  seemed simply to run in parallel to  $A$ . However, although the effects of  $N_{\text{leaf}}$  on the carboxylation activity of Rubisco is largely known (Sage and Percy, 1987), poor mechanistic explanations may be given in this research as the  $N_{\text{leaf}}$  and leaf ageing effects cannot be separated. Still, as  $g_s$  is poorly correlated with  $T_{\text{leaf}}$  over 33 °C while  $A$  still decreased up to 38 °C, non-stomatal limitations of high  $T_{\text{leaf}}$  upon  $A$  seemed highly probable (Farquhar and Sharkey, 1982). Since 54% (1999) and 47% (2000) of days showed temperatures over 28 °C during the growing season, summer temperatures might be a basic constraint for chicory grown in this area, independently from the water regime.

Generally, the DP did not appear affected statistically by the water regime and the harvest time. The only exception concerned the final harvest of 1999 that significantly lowered the DP. This was not found in the final harvest of 2000 which, however, was performed one month earlier than in 1999. Since the depolymerization process is modulated by the enzymes FEH and FFT, that are mostly active when low temperatures occur and no more sucrose is provided (Van den Ende and Van Laere, 2002; Denroy, 1996), it was not surprising to find a strong reduction of DP in 1999 since this harvest occurred when night temperatures were low and many days after total leaf senescence. This study's results were corroborated by those of Wilson *et al.* (2004) that found the DP > 20 category to decline from 23% to 13% a few days after the first frost.

To sum up, despite the fact that water availability consistently increased biomass accumulation, water restoration seems not to be worthwhile in this area. *RUE* and *NAR* weighed on fructan clearly showed the reserves to override the above-ground structural parts. Thus the dry biomass accumulation did not run in parallel to the fructan storage, that was not significantly lower in rainfed conditions. The only significant effect of water regime was to speed up the fructan accumulation, probably related to the sink-to-source ratio. The harvest time was found to be strongly detrimental of the quality, both on fructan chain length and normal distribution of chain classes. Among the leaf traits, temperature appeared to be the most influencing parameter upon photosynthetic capacity. Therefore, since durable high temperatures generally occur in this region during the growing cycle, they may represent a basic constraint for chicory yield, independently from the water regime.

### Acknowledgements

This work was supported by the MURST Project 'Crops for Inulin Production: models of environmental crop response and cultural strategies'. The assistance of Dr Roberta Piccaglia during fructan analysis is gratefully acknowledged.

### References

- Allen RG, Pereira LS, Raes D, Smith M. 1998. *Crop evapotranspiration*. FAO irrigation and drainage paper 56. Rome: FAO, 103–125.
- Amaducci S, Pritoni G. 1998. Effect of harvest date and cultivar on *Cichorium intybus* yield components in north Italy. *Industrial Crops and Products* **7**, 345–349.
- Baert JRA. 1997. The effect of sowing and harvest date and cultivar on inulin yield and composition of chicory roots. *Industrial Crops and Products* **6**, 195–199.
- Danuso F. 2001. Crops for inulin production: state of the art and perspectives. *Rivista di Agronomia* **35**, 176–187.
- De Leenheer L. 1994. Production and use of inulin: industrial reality with a promising future. In: Van Bekkum H, Röper H, Voragen F, eds. *Carbohydrates as organic raw materials*, III. Proceedings of the 3rd International Workshop on Carbohydrates as Organic Materials, Wageningen.
- De Bruyn A, Alvarez AP, Sandra P, De Leenheer L. 1992. Isolation and identification of  $\beta$ -D-fructofuranosyl-(2,1)-D-fructose, a product of enzymatic hydrolysis of the inulin from *Cichorium intybus*. *Carbohydrate Research* **235**, 303–308.
- Demeulemeester MAC, Verdoodt V, de Profit MP. 1998. Interaction between physiological age and cold treatment on the composition and concentration of carbohydrates in chicory roots (*Cichorium intybus*). *Journal of Plant Physiology* **3–4**, 437–445.
- Denoroy P. 1996. The crop physiology of *Helianthus tuberosus* L.: a model orientated view. *Biomass and Bioenergy* **11**, 11–32.
- Desprez BF, Delesalle L, Dhellemmes C, Desprez MF, Rambaud C, Vasseur J. 1999. Genetics and breeding of industrial chicory, a historical review. In: *Proceedings of the 8th seminar on inulin*, Lille, France, 1–10.
- Farquhar GD, Sharkey TD. 1982. Stomatal conductance and photosynthesis. *Annual Review of Plant Physiology* **33**, 317–345.
- Fuchs A. 1990. Perspectives of inulin and inulin-containing crops in the Netherlands in the early growth and in Europe. In: Fuchs A, ed. *Third seminar on inulin*. The Hague: National Council for Agricultural Research, 80–102.
- Hsiao TC. 1973. Plant responses to water stress. *Annual Review of Plant Physiology* **24**, 519–570.
- Khuri S, John P. 2000. Fructan exo-hydrolase activity in harvested chicory roots. In: *Proceedings of the fourth international fructan conference*, Basel, Switzerland, 45–47.
- Kjeldahl JZ. 1883. Neue Methode zur Bestimmung des Stickstoffs in organischen Körpern. *Zeitschrift für Analytische Chemie* **22**, 366–382.
- Meijer WJM, Mathijssen EWJM. 1992. Crop characteristics and inulin production in chicory. *European Journal of Agronomy* **2**, 99–108.
- Monsi M, Saeki T. 1953. Über den Lichtfaktor in den Pflanzengesellschaften und seine Bedeutung für die Stoffproduktion. *Japanese Journal of Botany* **14**, 22–52.
- Monteith JL. 1977. Climate and the efficiency of crop production. *Philosophical Transactions of the Royal Society of London Series B* **281**, 277–294.
- Monteith JL, Unsworth MH. 1990. *Principles of environmental physics*, 2nd edn. Edward Arnold.
- Monti A, Amaducci MT, Venturi G. 2005. Growth response, leaf gas exchange and fructans accumulation of Jerusalem artichoke (*Helianthus tuberosus*, L.) as affected by different water regimes. *European Journal of Agronomy* (available on line).
- Monti A, Pritoni G, Amaducci MT. 2002. Evaluation of chicory varieties in North Italy: inulin production and photosynthesis. In: *Proceedings of the ninth seminar on inulin*, 18–19 April 2002, Budapest, Hungary, 23.
- Pignatelli V. 1998. In: Amaducci MT, Marzi V, Venturi G: *Le Colture di Nicchia*. Edagricole (ed.), 81–89.
- Roberfroid MB, Delzenne NM. 1998. Dietary fructans. *Annual Review of Nutrition* **18**, 117–143.
- Sage RF, Percy RW. 1987. The nitrogen use efficiency of C<sub>3</sub> and C<sub>4</sub> plants. *Plant Physiology* **84**, 959–963.
- Salvucci ME, Crafts-Brandner SJ. 2004. Mechanism for deactivation of Rubisco under moderate stress. *Physiologia Plantarum* **122**, 513–519.
- Schittenhelm S. 1999. Agronomic performance of root chicory, Jerusalem artichoke and sugarbeet in stress and non-stress environment. *Crop Science* **39**, 1815–1823.
- Skinner R, Hall M, Sanderson M. 2002. *Water stress on Puna chicory and Lancelot Plantain. Morphological and physiological effects*. Agricultural Research Service, USDA.
- Tei F, Scaife A, Aikman DP. 1996. Growth of lettuce, onion, and red beet. 1. Growth analysis, light interception and radiation use efficiency. *Annals of Botany* **78**, 633–643.
- Van den Ende W, Van Laere A. 2002. Induction of 1-FEH in mature chicory roots appears to be related to low temperatures rather than to leaf damage. *Scientific World Journal* **2**, 1750–1761.
- von Caemmerer S, Farquhar GD. 1981. Some relationship between the biochemistry of photosynthesis and the gas exchange of leaves. *Planta* **153**, 376–387.
- Wilson RG, Smith JA, Yonts CD. 2004. Chicory root yield and carbohydrate composition is influenced by cultivar selection, planting and harvest date. *Crop Science* **44**, 748–752.
- Wise RR, Olson AJ, Schrader Sharkey TD. 2004. Electron transport is the functional limitation of the photosynthesis in field-grown Pima cotton plants at high temperature. *Plant, Cell and Environment* **27**, 1717–1724.
